# Supplementary material for: Evaluating Signs of Microangiopathy Secondary to Diabetes in Different Areas of the Retina with Swept Source OCTA
Source: PubMed Central journal article supplement — Invest Ophthalmol Vis Sci. 2020 May 11;61(5):8. doi: 10.1167/iovs.61.5.8 (PMC7405703; doi:10.1167/iovs.61.5.8), 2020-05-11
Supplement: iovs-61-5-8_s001.pdf [file iovs-61-5-8_s001.pdf]

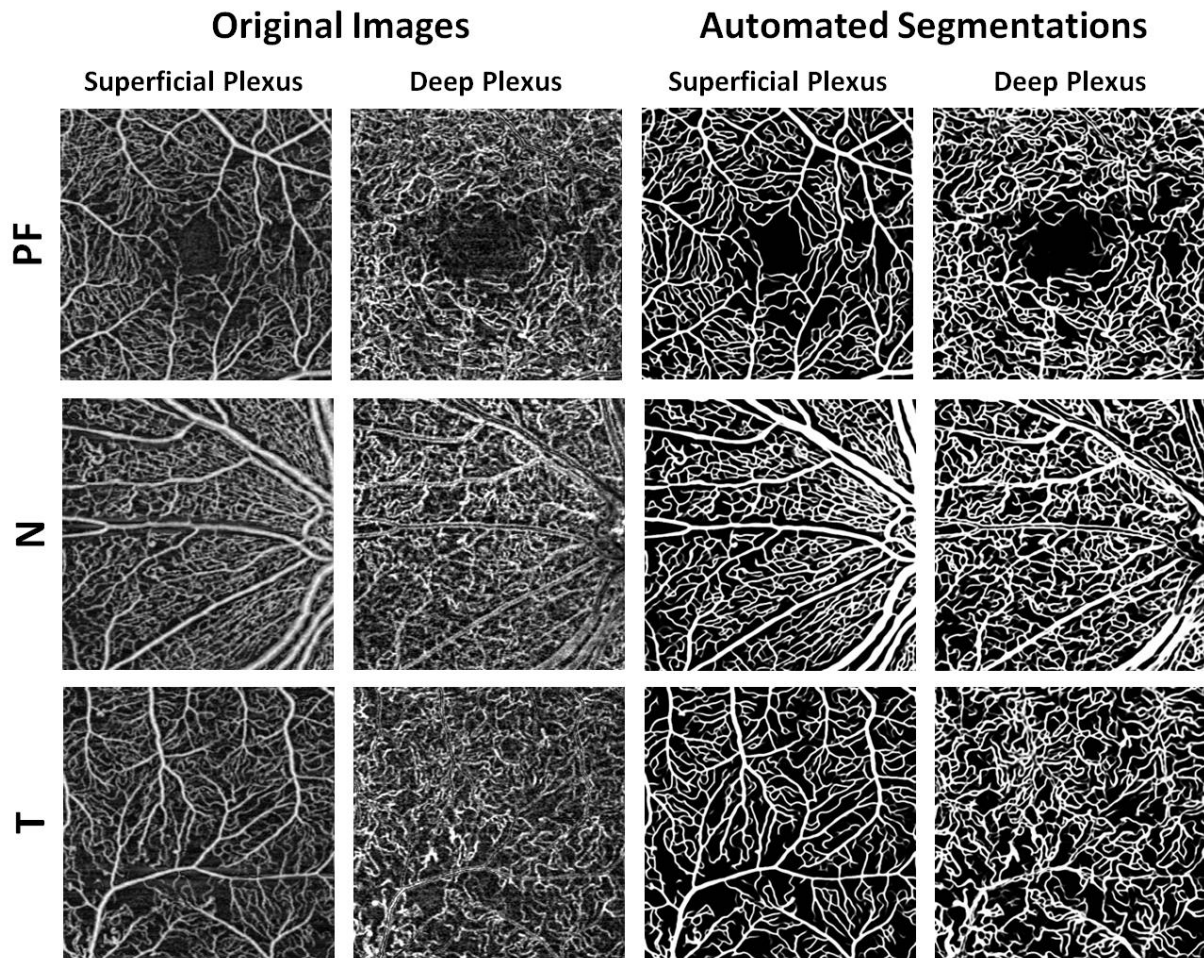

Supplemental material 1: Original OCTA images of the superficial and deep capillary plexus from the Zeiss Plex Elite of the parafovea (PF), nasal (N) and temporal (T) area as well as processed images after automated segmentation using a neural network.
