# Supplementary material for: Evaluating Signs of Microangiopathy Secondary to Diabetes in Different Areas of the Retina with Swept Source OCTA
Source: PubMed Central journal article supplement — Invest Ophthalmol Vis Sci. 2020 May 11;61(5):8. doi: 10.1167/iovs.61.5.8 (PMC7405703; doi:10.1167/iovs.61.5.8), 2020-05-11
Supplement: iovs-61-5-8_s002.pdf [file iovs-61-5-8_s002.pdf]

|              | Control-N | Control-F | Control-T | noDR-N | noDR-F | noDR-T | Mild-N | Mild-F | Mild-T | Mod/Severe-N | Mod/Severe-F | Mod/Severe-T | Prolif-N | Prolif-F | Prolif-T |
|--------------|-----------|-----------|-----------|--------|--------|--------|--------|--------|--------|--------------|--------------|--------------|----------|----------|----------|
| Control-N    | -         | ★         | ★         | 0.9    | -      | -      | 0.9    | -      | -      | ★            | -            | -            | ★        | -        | -        |
| Control-F    | ★         | -         | 0.9       | -      | 1      | -      | -      | ★      | -      | -            | ★            | -            | -        | ★        | -        |
| Control-T    | ★         | 0.9       | -         | -      | -      | 1      | -      | -      | 0.7    | -            | -            | ★            | -        | -        | ★        |
| noDR-N       | 0.9       | -         | -         | -      | ★      | ★      | ★      | -      | -      | 1            | -            | -            | ★        | -        | -        |
| noDR-F       | -         | 1         | -         | ★      | -      | 0.4    | -      | ★      | -      | -            | ★            | -            | -        | ★        | -        |
| noDR-T       | -         | -         | 1         | ★      | 0.4    | -      | -      | -      | ★      | -            | -            | 0.2          | -        | -        | ★        |
| Mild-N       | 0.9       | -         | -         | 1      | -      | -      | -      | ★      | ★      | ★            | -            | -            | ★        | -        | -        |
| Mild-F       | -         | ★         | -         | -      | ★      | -      | ★      | -      | ★      | -            | ★            | -            | -        | ★        | -        |
| Mild-T       | -         | -         | 0.7       | -      | -      | 0.2    | ★      | ★      | -      | -            | -            | ★            | -        | -        | ★        |
| Mod/Severe-N | ★         | -         | -         | ★      | -      | -      | ★      | -      | -      | -            | ★            | ★            | ★        | -        | -        |
| Mod/Severe-F | -         | ★         | -         | -      | ★      | -      | -      | ★      | -      | ★            | -            | ★            | -        | ★        | -        |
| Mod/Severe-T | -         | -         | ★         | -      | -      | ★      | -      | -      | ★      | ★            | ★            | -            | -        | -        | ★        |
| Prolif-N     | ★         | -         | -         | ★      | -      | -      | ★      | -      | -      | ★            | -            | -            | -        | ★        | ★        |
| Prolif-F     | -         | ★         | -         | -      | ★      | -      | -      | ★      | -      | -            | ★            | -            | ★        | -        | ★        |
| Prolif-T     | -         | -         | ★         | -      | -      | ★      | -      | -      | ★      | -            | -            | ★            | ★        | ★        | -        |

Superficial capillary density

|              | Control-N | Control-F | Control-T | noDR-N | noDR-F | noDR-T | Mild-N | Mild-F | Mild-T | Mod/Severe-N | Mod/Severe-F | Mod/Severe-T | Prolif-N | Prolif-F | Prolif-T |
|--------------|-----------|-----------|-----------|--------|--------|--------|--------|--------|--------|--------------|--------------|--------------|----------|----------|----------|
| Control-N    | -         | ★         | ★         | 1      | -      | -      | 1      | -      | -      | ★            | -            | -            | ★        | -        | -        |
| Control-F    | ★         | -         | 1         | -      | 1      | -      | -      | 0.1    | -      | -            | ★            | -            | -        | ★        | -        |
| Control-T    | ★         | 1         | -         | -      | -      | 1      | -      | -      | 0.8    | -            | -            | ★            | -        | -        | ★        |
| noDR-N       | 1         | -         | -         | -      | ★      | ★      | ★      | -      | -      | 1            | -            | -            | ★        | -        | -        |
| noDR-F       | -         | 1         | -         | ★      | -      | 0.7    | -      | ★      | -      | -            | 0.1          | -            | -        | ★        | -        |
| noDR-T       | -         | -         | 1         | ★      | 0.7    | -      | -      | -      | ★      | -            | -            | 0.5          | -        | -        | ★        |
| Mild-N       | 1         | -         | -         | 1      | -      | -      | -      | ★      | ★      | ★            | -            | -            | ★        | -        | -        |
| Mild-F       | -         | 0.1       | -         | -      | 0.1    | -      | ★      | -      | ★      | -            | ★            | -            | -        | ★        | -        |
| Mild-T       | -         | -         | 0.8       | -      | -      | 0.5    | ★      | ★      | -      | -            | -            | ★            | -        | -        | ★        |
| Mod/Severe-N | ★         | -         | -         | ★      | -      | -      | ★      | -      | -      | -            | ★            | ★            | ★        | -        | -        |
| Mod/Severe-F | -         | ★         | -         | -      | ★      | -      | -      | ★      | -      | ★            | -            | ★            | -        | ★        | -        |
| Mod/Severe-T | -         | -         | ★         | -      | -      | ★      | -      | -      | ★      | ★            | ★            | -            | -        | -        | ★        |
| Prolif-N     | ★         | -         | -         | ★      | -      | -      | ★      | -      | -      | ★            | -            | -            | -        | ★        | ★        |
| Prolif-F     | -         | ★         | -         | -      | ★      | -      | -      | ★      | -      | -            | ★            | -            | ★        | -        | ★        |
| Prolif-T     | -         | -         | ★         | -      | -      | ★      | -      | -      | ★      | -            | -            | ★            | ★        | ★        | -        |

Fractal dimension

|              | Control-N | Control-F | Control-T | noDR-N | noDR-F | noDR-T | Mild-N | Mild-F | Mild-T | Mod/Severe-N | Mod/Severe-F | Mod/Severe-T | Prolif-N | Prolif-F | Prolif-T |
|--------------|-----------|-----------|-----------|--------|--------|--------|--------|--------|--------|--------------|--------------|--------------|----------|----------|----------|
| Control-N    | -         | 0.2       | ★         | 0.2    | -      | -      | ★      | -      | -      | ★            | -            | -            | ★        | -        | -        |
| Control-F    | 0.2       | -         | 0.1       | -      | 0.5    | -      | -      | ★      | -      | -            | ★            | -            | -        | ★        | -        |
| Control-T    | ★         | 0.1       | -         | -      | -      | 0.1    | -      | -      | ★      | -            | -            | ★            | -        | -        | ★        |
| noDR-N       | 0.2       | -         | -         | -      | 0.4    | 0.2    | ★      | -      | -      | 0.4          | -            | -            | ★        | -        | -        |
| noDR-F       | -         | 0.5       | -         | 0.4    | -      | 0.8    | -      | ★      | -      | -            | 0.6          | -            | -        | ★        | -        |
| noDR-T       | -         | -         | 0.1       | 0.2    | 0.8    | -      | -      | -      | ★      | -            | -            | 0.7          | -        | -        | ★        |
| Mild-N       | ★         | -         | -         | 0.4    | -      | -      | -      | 0.9    | 0.1    | ★            | -            | -            | ★        | -        | -        |
| Mild-F       | -         | ★         | -         | -      | 0.6    | -      | 0.9    | -      | 0.1    | -            | ★            | -            | -        | ★        | -        |
| Mild-T       | -         | -         | ★         | -      | -      | 0.7    | 0.1    | 0.1    | -      | -            | -            | ★            | -        | -        | ★        |
| Mod/Severe-N | ★         | -         | -         | ★      | -      | -      | ★      | -      | -      | -            | ★            | ★            | 0.8      | -        | -        |
| Mod/Severe-F | -         | ★         | -         | -      | ★      | -      | -      | ★      | -      | ★            | -            | ★            | -        | 0.1      | -        |
| Mod/Severe-T | -         | -         | ★         | -      | -      | ★      | -      | -      | ★      | ★            | ★            | -            | -        | -        | 0.1      |
| Prolif-N     | ★         | -         | -         | ★      | -      | -      | ★      | -      | -      | 0.8          | -            | -            | -        | ★        | ★        |
| Prolif-F     | -         | ★         | -         | -      | ★      | -      | -      | ★      | -      | -            | 0.1          | -            | ★        | -        | 0.9      |
| Prolif-T     | -         | -         | ★         | -      | -      | ★      | -      | -      | ★      | -            | -            | 0.1          | ★        | 0.9      | -        |

Deep capillar density

Supplemental material 2: Pairwise comparison between different locations and DR severity levels for each outcome. N = nasal, F = foveal, T = temporal
